# Supplementary material for: Effect of TyG Index on endovascular therapy in large vessel occlusion stroke: Disparity by stroke etiologies
Source: Research Square preprint supplement (doi:10.21203/rs.3.rs-7946167/v1), 2025-11-04
Supplement: Supplementary file 2 [file 9699d15367c57ab9ab161f59.docx]

**Supplementary materials**

**Figure S1.** Flowchart of patient selection.


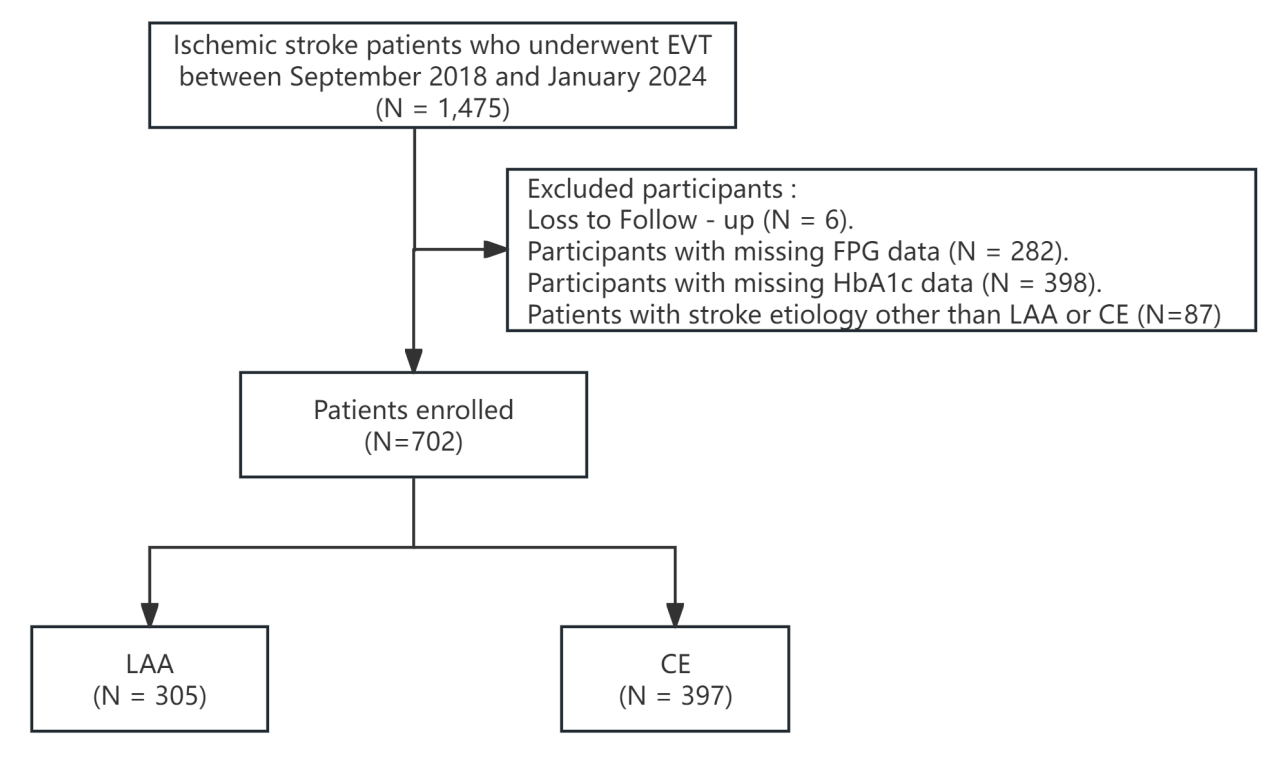


This figure presents the enrollment information of patients included in this study. EVT, endovascular therapy; FPG, fasting plasma glucose; HbA1c, glycated hemoglobin; LAA, large artery atherosclerosis; CE, cardioembolism.

**Figure S2.** Comparable distributions of TyG index across tertiles in patients with LAA and CE strokes


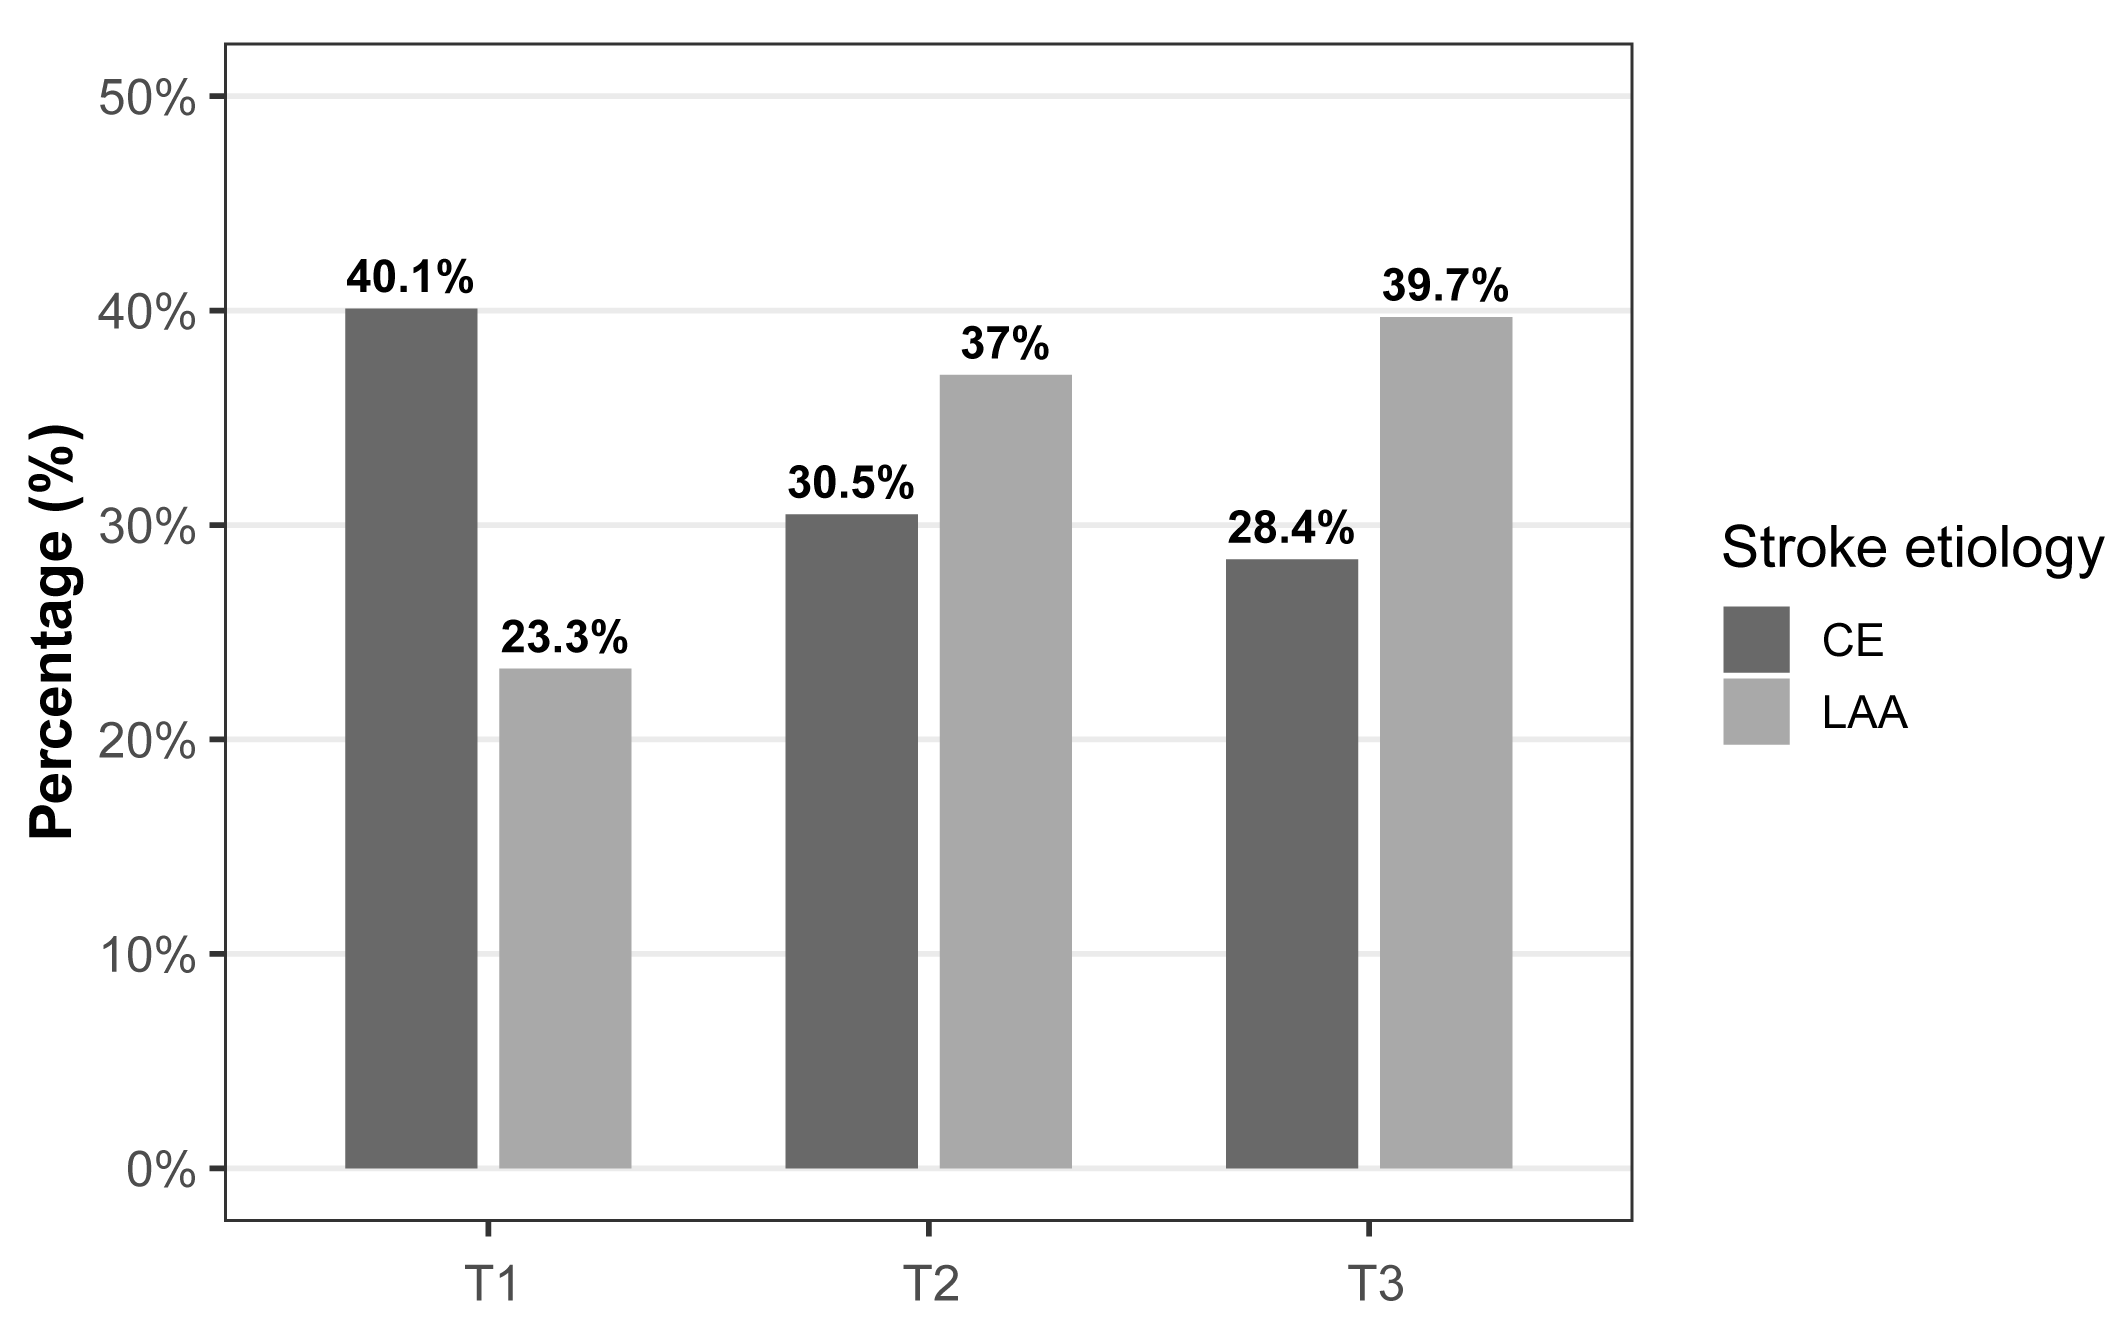


The proportions of patients across TyG index tertiles differed between those with LAA and CE strokes. Higher TyG index tertiles were associated with a greater proportion of patients with LAA strokes, whereas the opposite was observed for CE strokes.

Abbreviations: TyG index, triglyceride-glucose index; CE, cardioembolism; LAA, large artery atherosclerosis.

**Figure S3.** Interaction between tyg index and stroke etiology (LAA vs. CE) on outcomes in patients with successful recanalization (sensitivity analysis)


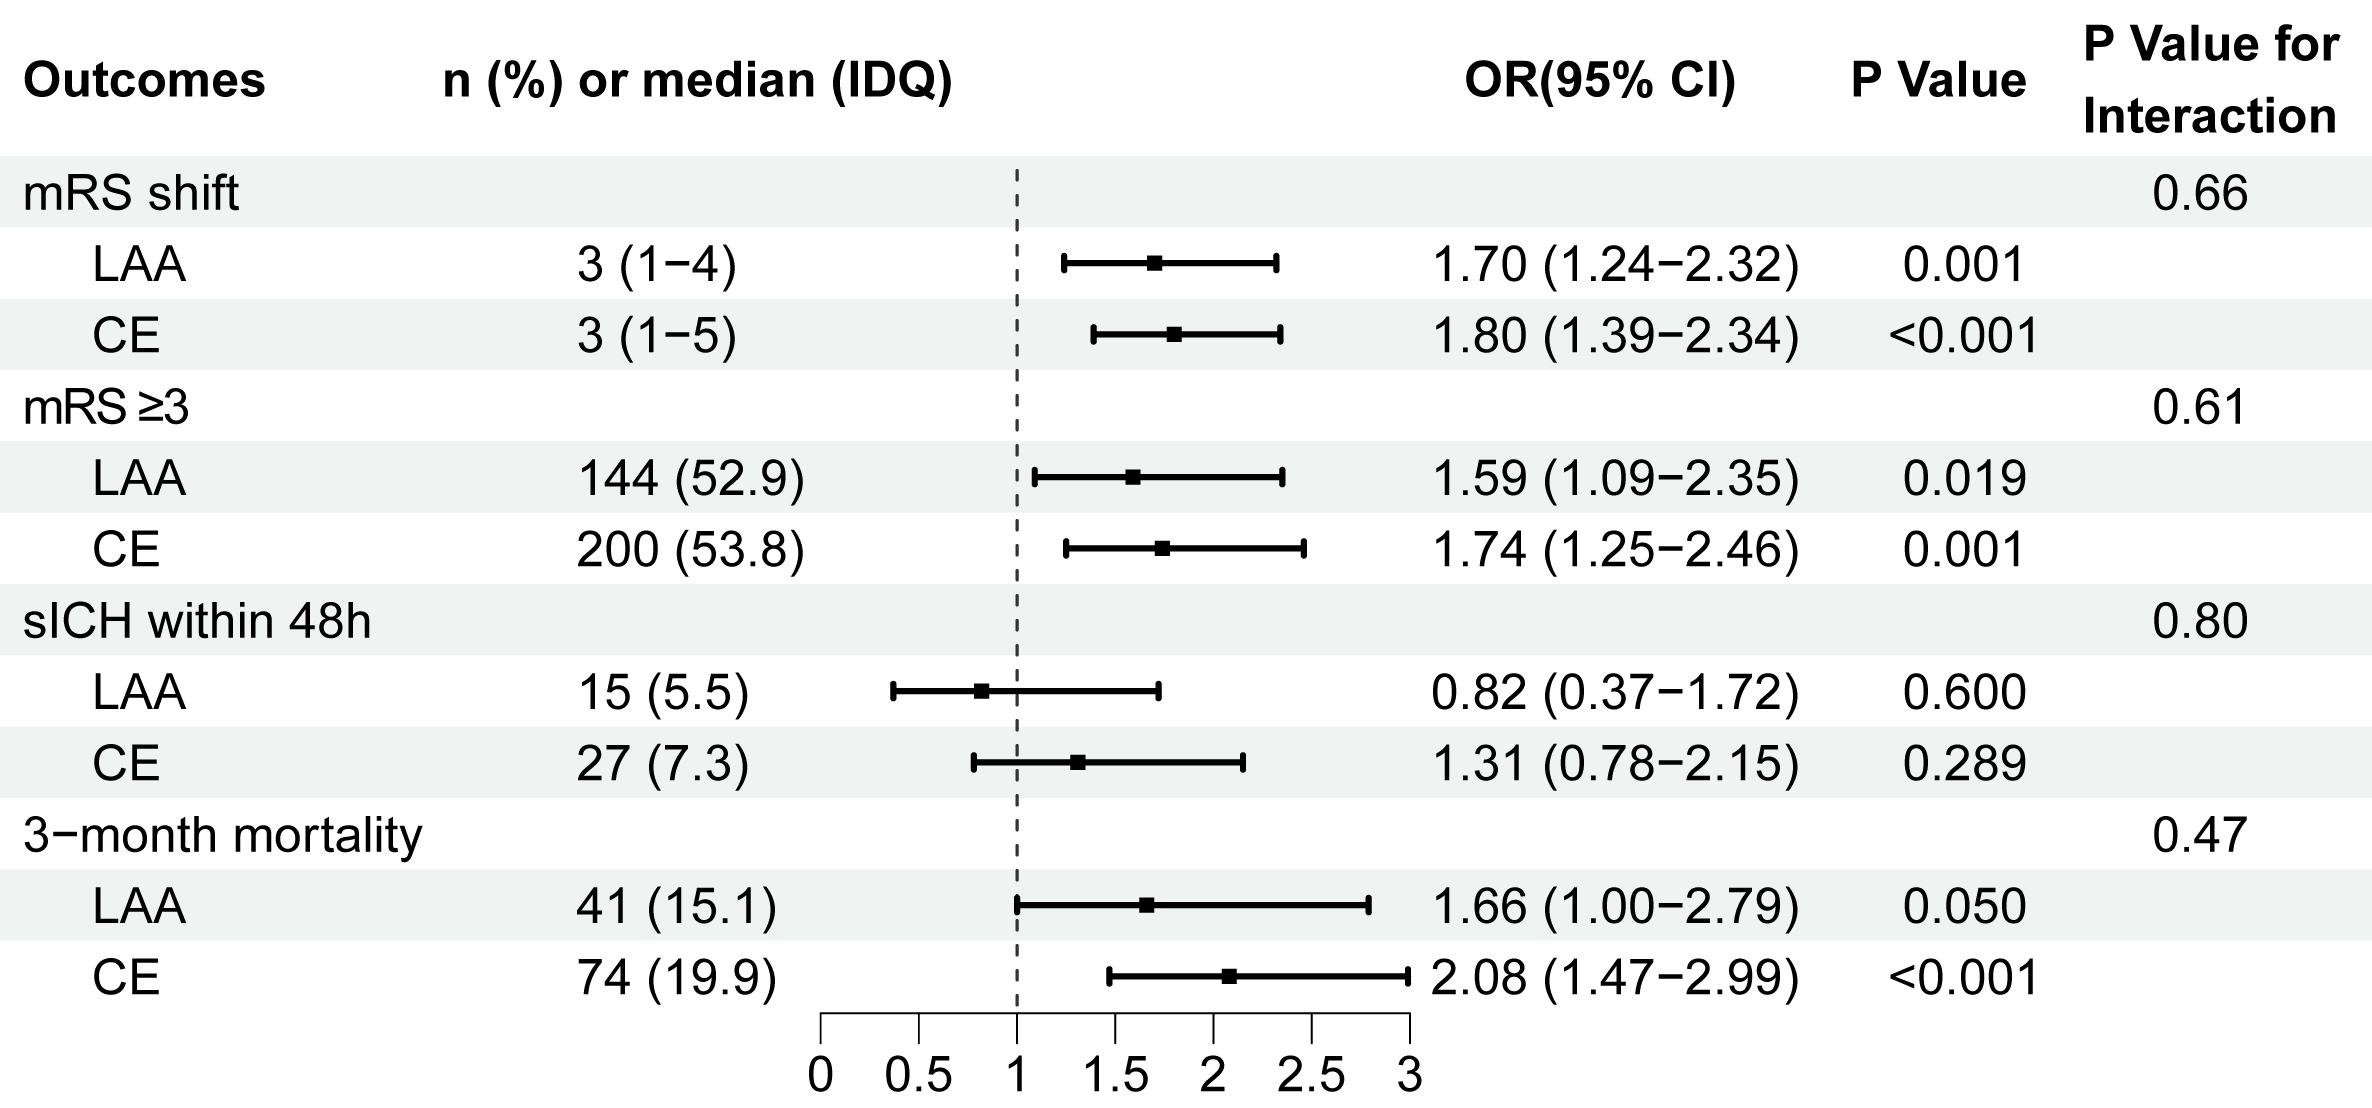


There was no significant interaction between TyG index and stroke etiology on any of the outcomes (all *p* for interaction >0.05).

Abbreviations: mRS shift, a shift toward worse outcomes on the mRS; successful recanalization, an expanded TICI scale ≥ 2b; sICH, symptomatic intracranial hemorrhage; LAA, large artery atherosclerosis; CE, cardioembolism; CI, confidence interval; OR, odds ratio; IQR, interquartile range; mRS, modified Rankin Scale.

**Table S1.** Baseline characteristics and clinical outcomes based on TyG index tertiles in all patients

|  | Total (n = 702) | T1 (n = 234) | T2 (n = 234) | T3 (n = 234) | *P*‐value |
| --- | --- | --- | --- | --- | --- |
| Age (years) | 69 (60-76) | 71 (63-77) | 70 (59-77) | 67 (58-75) | 0.029 |
| Male (n, %) | 387 (55.1) | 139 (59.4) | 126 (53.8) | 122 (52.1) | 0.255 |
| Smoking history (n, %) | 165 (23.5) | 51 (21.8) | 52 (22.2) | 62 (26.5) | 0.415 |
| Atrial fibrillation (n, %) | 312 (44.4) | 122 (52.1) | 100 (42.7) | 90 (38.5) | 0.010 |
| Hypertension (n, %) | 415 (59.1) | 127 (54.3) | 146 (62.4) | 142 (60.7) | 0.170 |
| Hyperlipidemia (n, %) | 137 (19.5) | 16 (6.8) | 35 (15.0) | 86 (36.8) | <0.001 |
| Diabetes (n, %) | 177 (25.2) | 27 (11.5) | 42 (17.9) | 108 (46.2) | <0.001 |
| SBP (mmHg) | 145 (128-161) | 146 (127-161) | 141 (128-160) | 147 (130-164) | 0.269 |
| DBP (mmHg) | 83 (73-95) | 82 (73-95) | 83 (73-94) | 85 (75-95) | 0.571 |
| Laboratory examination |  |  |  |  |  |
| TG (mmol/L) | 1.17 (0.80-1.76) | 0.73 (0.63-0.85) | 1.21 (1.02-1.49) | 2.25 (1.60-3.50) | <0.001 |
| FPG (mmol/L) | 6.90 (5.82-8.75) | 6.03 (5.40-7.00) | 6.70 (5.85-7.38) | 8.14 (7.81-12.20) | <0.001 |
| HbA1c (%) | 5.9 (5.6-6.4) | 5.8 (5.5-6.0) | 5.8 (5.5-6.2) | 6.3 (5.9-7.8) | <0.001 |
| Crea (umol/L) | 71.0 (57.0-90.0) | 70.3 (56.9-88.5) | 69.0 (57.0-86.2) | 73.6 (57.9-94.0) | 0.091 |
| Urea (mmol/L) | 5.84 (4.65-7.43) | 5.88 (4.49-7.56) | 5.70 (4.60-6.84) | 6.00 (4.93-7.86) | 0.033 |
| TC (mmol/L) | 4.26 (3.57-5.05) | 3.96 (3.29-4.72) | 4.25 (3.62-5.04) | 4.65 (3.95-5.41) | <0.001 |
| LDL-C (mmol/L) | 2.48 (1.90-3.08) | 2.29 (1.74-2.90) | 2.58 (2.10-3.16) | 2.64 (2.03-3.27) | <0.001 |
| NIHSS baseline | 16 (12-19) | 16 (12-19) | 16 (12-19) | 16 (13-20) | 0.736 |
| ASPECTS | 7 (6-9) | 7 (6-8) | 7 (6-9) | 7 (5-9) | 0.184 |
| Onset to puncture time (min) | 329 (221-534) | 340 (230-562) | 312 (214-476) | 335 (221-538) | 0.274 |
| Onset to recanalization time (min) | 407 (292-631) | 414 (299-658) | 409 (285-572) | 399 (297-654) | 0.644 |
| Local anesthesia (n, %) | 553 (78.8) | 187 (79.9) | 177 (75.6) | 189 (80.8) | 0.348 |
| IVT (n, %) | 104 (14.8) | 25 (10.7) | 42 (17.9) | 37 (15.8) | 0.075 |
| Occlusion location (n, %) |  |  |  |  | 0.109 |
| ICA | 169 (24.1) | 61 (26.1) | 49 (20.9) | 59 (25.2) |  |
| M1 | 448 (63.8) | 136 (58.1) | 161 (68.8) | 151 (64.5) |  |
| M2 | 85 (12.1) | 37 (15.8) | 24 (10.3) | 24 (10.3) |  |
| Clinical outcomes (n, %) |  |  |  |  |  |
| D90 mRS score | 3 (1-5) | 2 (1-4) | 3 (1-4) | 3 (2-6) | <0.001 |
| mRS 3-6 | 395 (56.3) | 117 (50.0) | 127 (54.3) | 151 (64.5) | 0.005 |
| successful reperfusion | 644 (92.0) | 221 (94.4) | 212 (91.0) | 211 (90.6) | 0.237 |
| sICH | 50 (7.1) | 15 (6.4) | 17 (7.3) | 18 (7.7) | 0.854 |
| mortality | 138 (19.7) | 36 (15.4) | 38 (16.2) | 64 (27.4) | 0.001 |

LAA, large artery atherosclerosis; CE, cardioembolism; SBP, systolic blood pressure; DBP, diastolic blood pressure; TG, triglyceride; FPG, fasting plasma glucose; TyG, triglyceride-glucose index; TC, total cholesterol; LDL-C, low-density lipoprotein cholesterol; HbA1c, glycated hemoglobin; NIHSS, National Institutes of Health Stroke Scale; ASPECTS, Alberta Stroke Program Early Computed Tomography Score; IVT, intravenous thrombolysis; ICA, internal carotid artery; MCA-M1/M2, M1 or M2 segment of middle cerebral artery; mRS, modified Rankin Scale score; sICH, symptomatic intracranial hemorrhage.

**Table S2.** Baseline characteristics and clinical outcomes based on TyG index tertiles in LAA stroke patients

|  | Total (n = 305) | T1 (n = 71) | T2 (n = 113) | T3 (n = 121) | *P*‐value |
| --- | --- | --- | --- | --- | --- |
| Age (years) | 65 (56-73) | 68 (61-75) | 66 (55-73) | 64 (56-71) | 0.083 |
| Male (n, %) | 207 (67.9) | 56 (78.9) | 77 (68.1) | 74 (61.2) | 0.040 |
| Smoking history (n, %) | 100 (32.8) | 20 (28.2) | 40 (35.4) | 40 (33.1) | 0.594 |
| Atrial fibrillation (n, %) | 30 (9.8) | 5 (7.0) | 15 (13.3) | 10 (8.3) | 0.291 |
| Hypertension (n, %) | 207 (67.9) | 42 (59.2) | 79 (69.9) | 86 (71.1) | 0.196 |
| Hyperlipidemia (n, %) | 75 (24.6) | 4 (5.6) | 23 (20.4) | 48 (39.7) | <0.001 |
| Diabetes (n, %) | 98 (32.1) | 10 (14.1) | 26 (23.0) | 62 (51.2) | <0.001 |
| SBP (mmHg) | 148 (134-168) | 148 (135-162) | 148 (132-168) | 149 (138-169) | 0.512 |
| DBP (mmHg) | 86 (75-95) | 84 (74-92) | 85 (74-97) | 87 (80-95) | 0.289 |
| Laboratory examination |  |  |  |  |  |
| TG (mmol/L) | 1.39 (1.00-2.04) | 0.75 (0.65-0.98) | 1.30 (1.11-1.53) | 2.20 (1.60-3.51) | <0.001 |
| FPG (mmol/L) | 6.97 (5.77-9.24) | 6.90 (5.12-6.89) | 6.39 (5.71-7.50) | 9.20 (6.97-12.80) | <0.001 |
| HbA1c (%) | 6.0 (5.6-6.8) | 5.9 (5.4-6.1) | 5.7 (5.5-6.3) | 6.7 (5.9-8.2) | <0.001 |
| Crea (umol/L) | 71.0 (57.1-88.0) | 69.8 (57.3-82.2) | 70.4 (59.0-90.0) | 74.0 (56.6-90.0) | 0.497 |
| Urea (mmol/L) | 5.48 (4.41-7.14) | 5.27 (4.12-7.00) | 5.36 (4.50-6.80) | 5.70 (4.63-7.24) | 0.472 |
| TC (mmol/L) | 4.53 (3.85-5.24) | 4.10 (3.38-4.77) | 4.49 (3.80-5.26) | 4.76 (4.25-5.41) | <0.001 |
| LDL-C (mmol/L) | 2.75 (2.17-3.31) | 2.50 (1.94-3.00) | 2.87 (2.21-3.34) | 2.76 (2.20-3.43) | 0.019 |
| NIHSS baseline | 15 (11-19) | 14 (11-18) | 15 (12-19) | 15 (11-19) | 0.722 |
| ASPECTS | 7 (6-9) | 7 (6-8) | 7 (6-9) | 8 (6-9) | 0.468 |
| Onset to puncture time (min) | 282 (200-415) | 299 (211-463) | 279 (200-380) | 275 (186-450) | 0.249 |
| Onset to recanalization time (min) | 349 (265-496) | 361 (277-505) | 349 (262-462) | 343 (258-510) | 0.487 |
| Local anesthesia (n, %) | 223 (73.1) | 51 (71.8) | 81 (71.7) | 91 (75.2) | 0.800 |
| IVT (n, %) | 33 (10.8) | 3 (4.2) | 15 (13.3) | 15 (12.4) | 0.121 |
| Occlusion location (n, %) |  |  |  |  | 0.079 |
| ICA | 53 (17.4) | 17 (23.9) | 15 (13.3) | 21 (17.4) |  |
| M1 | 218 (71.5) | 42 (59.2) | 89 (78.8) | 87 (71.9) |  |
| M2 | 34 (11.1) | 12 (16.9) | 9 (8.0) | 13 (10.7) |  |
| Clinical outcomes (n, %) |  |  |  |  |  |
| D90 mRS score | 3 (1-4) | 3 (1-4) | 3 (1-4) | 3 (2-5) | 0.030 |
| mRS 3-6 | 173 (56.7) | 36 (50.7) | 61 (54.0) | 76 (62.8) | 0.200 |
| successful reperfusion | 272 (89.2) | 65 (91.5) | 102 (90.3) | 105 (86.8) | 0.529 |
| sICH | 19 (6.2) | 4 (5.6) | 6 (5.3) | 9 (7.4) | 0.724 |
| mortality | 54 (17.7) | 10 (14.1) | 15 (13.3) | 29 (24.0) | 0.067 |

LAA, large artery atherosclerosis; CE, cardioembolism; SBP, systolic blood pressure; DBP, diastolic blood pressure; TG, triglyceride; FPG, fasting plasma glucose; TyG, triglyceride-glucose index; TC, total cholesterol; LDL-C, low-density lipoprotein cholesterol; HbA1c, glycated hemoglobin; NIHSS, National Institutes of Health Stroke Scale; ASPECTS, Alberta Stroke Program Early Computed Tomography Score; IVT, intravenous thrombolysis; ICA, internal carotid artery; MCA-M1/M2, M1 or M2 segment of middle cerebral artery; mRS, modified Rankin Scale score; sICH, symptomatic intracranial hemorrhage.

**Table S3.** Baseline characteristics and clinical outcomes based on TyG index tertiles in CE stroke patients

|  | Total (n = 397) | T1 (n = 163) | T2 (n = 121) | T3 (n = 113) | *P*‐value |
| --- | --- | --- | --- | --- | --- |
| Age (years) | 72 (64-78) | 72 (64-78) | 74 (65-78) | 71 (64-77) | 0.602 |
| Male (n, %) | 180 (45.3) | 83 (50.9) | 49 (40.5) | 48 (42.5) | 0.168 |
| Smoking history (n, %) | 65 (16.4) | 31 (19.0) | 12 (9.9) | 22 (19.5) | 0.070 |
| Atrial fibrillation (n, %) | 282 (71.0) | 117 (71.8) | 85 (70.2) | 80 (70.8) | 0.959 |
| Hypertension (n, %) | 208 (52.4) | 85 (52.1) | 67 (55.4) | 56 (49.6) | 0.671 |
| Hyperlipidemia (n, %) | 62 (15.6) | 12 (7.4) | 12 (9.9) | 38 (33.6) | <0.001 |
| Diabetes (n, %) | 79 (19.9) | 17 (10.4) | 16 (13.2) | 46 (40.7) | <0.001 |
| SBP (mmHg) | 141 (125-159) | 145 (127-161) | 139 (122-150) | 141 (123-160) | 0.057 |
| DBP (mmHg) | 81 (72-94) | 81 (73-97) | 80 (70-91) | 80 (72-94) | 0.7 |
| Laboratory examination |  |  |  |  |  |
| TG (mmol/L) | 1.03 (0.75-1.59) | 0.72 (0.63-0.82) | 1.14 (0.97-1.38) | 2.26 (1.62-3.49) | <0.001 |
| FPG (mmol/L) | 6.81 (5.84-8.50) | 6.09 (5.48-7.00) | 6.79 (6.11-8.30) | 8.70 (7.43-11.50) | <0.001 |
| HbA1c (%) | 5.9 (5.6-6.2) | 5.7 (5.5-6.0) | 5.8 (5.6-6.2) | 6.2 (5.9-7.2) | <0.001 |
| Crea (umol/L) | 71.0 (57.0-92.0) | 70.6 (56.9-91.0) | 68.1 (55.0-80.0) | 73.1 (60.2-98.0) | 0.069 |
| Urea (mmol/L) | 6.00(4.93-7.62) | 5.99 (4.68-7.65) | 5.80 (4.65-6.85) | 6.32 (5.32-8.30) | 0.013 |
| TC (mmol/L) | 4.07 (3.37-4.89) | 3.90 (3.23-4.60) | 4.09 (3.56-4.72) | 4.40 (3.61-5.41) | 0.001 |
| LDL-C (mmol/L) | 2.30 (1.80-2.91) | 2.18 (1.73-2.76) | 2.35 (1.87-2.87) | 2.40 (1.88-3.13) | 0.02 |
| NIHSS baseline | 16 (13-20) | 16 (13-19) | 16 (13-19) | 17 (13-21) | 0.298 |
| ASPECTS | 7 (5-8) | 7 (6-8) | 7 (6-9) | 7 (5-8) | 0.085 |
| Onset to puncture time (min) | 282 (200-415) | 299 (211-463) | 279 (200-380) | 275 (186-450) | 0.249 |
| Onset to recanalization time (min) | 349 (265-496) | 361 (277-505) | 349 (262-462) | 343 (258-510) | 0.487 |
| Local anesthesia (n, %) | 330 (83.1) | 136 (83.4) | 96 (79.3) | 98 (86.7) | 0.318 |
| IVT (n, %) | 71 (17.9) | 22 (13.5) | 27 (22.3) | 22 (19.5) | 0.139 |
| Occlusion location (n, %) |  |  |  |  | 0.588 |
| ICA | 116 (29.2) | 44 (27.0) | 34 (28.1) | 38 (33.6) |  |
| M1 | 230 (57.9) | 94 (57.7) | 72 (59.5) | 64 (56.6) |  |
| M2 | 51 (12.8) | 25 (15.3) | 15 (12.4) | 11 (9.7) |  |
| Clinical outcomes (n, %) |  |  |  |  |  |
| D90 mRS score | 3 (1-5) | 2 (1-4) | 3 (1-5) | 4 (2-6) | 0.008 |
| mRS 3-6 | 222 (55.9) | 81 (49.7) | 66 (54.5) | 75 (66.4) | 0.022 |
| successful reperfusion | 372 (93.7) | 156 (95.7) | 110 (90.9) | 106 (93.8) | 0.328 |
| sICH | 31 (7.8) | 11 (6.7) | 11 (9.1) | 9 (8.0) | 0.583 |
| mortality | 84 (21.2) | 26 (16.0) | 23 (19.0) | 35 (31.0) | 0.009 |

LAA, large artery atherosclerosis; CE, cardioembolism; SBP, systolic blood pressure; DBP, diastolic blood pressure; TG, triglyceride; FPG, fasting plasma glucose; TyG, triglyceride-glucose index; TC, total cholesterol; LDL-C, low-density lipoprotein cholesterol; HbA1c, glycated hemoglobin; NIHSS, National Institutes of Health Stroke Scale; ASPECTS, Alberta Stroke Program Early Computed Tomography Score; IVT, intravenous thrombolysis; ICA, internal carotid artery; MCA-M1/M2, M1 or M2 segment of middle cerebral artery; mRS, modified Rankin Scale score; sICH, symptomatic intracranial hemorrhage.

**Table S4.** Correlations between TyG index and post-EVT outcomes in all patients

| **Outcomes** | **TyG** | Model 1 | |  | Model 2 | |  | Model 3 | |
| --- | --- | --- | --- | --- | --- | --- | --- | --- | --- |
| OR (95% CI) | *P*‐value |  | OR (95% CI) | *P*‐value |  | OR (95% CI) | *P*‐value |
| mRS shift | continuous | 1.60 (1.35-1.90) | <0.001 |  | 1.72 (1.45-2.05) | <0.001 |  | 1.77 (1.47-2.14) | <0.001 |
|  | T1 | – |  |  | – |  |  | – |  |
|  | T2 | 1.08 (0.79–1.48) | 0.635 |  | 1.17 (0.85–1.62) | 0.322 |  | 1.18 (0.85–1.64) | 0.310 |
|  | T3 | 1.82 (1.32–2.50) | <0.001 |  | 2.18 (1.58–3.02) | <0.001 |  | 2.22 (1.57–3.14) | <0.001 |
| mRS ≥3 | continuous | 1.61 (1.32–1.99) | <0.001 |  | 1.74 (1.40–2.17) | <0.001 |  | 1.74 (1.37–2.22) | <0.001 |
|  | T1 | – |  |  | – |  |  | – |  |
|  | T2 | 1.19 (0.83–1.71) | 0.355 |  | 1.26 (0.87–1.85) | 0.223 |  | 1.31 (0.88–1.95) | 0.181 |
|  | T3 | 1.82 (1.26–2.64) | 0.002 |  | 2.10 (1.42–3.11) | <0.001 |  | 2.08 (1.36–3.20) | <0.001 |
| Successful recanalization | continuous | 0.74 (0.53–1.04) | 0.078 |  | 0.76 (0.55–1.06) | 0.103 |  | 0.80 (0.55–1.17) | 0.241 |
|  | T1 | – |  |  | – |  |  | – |  |
|  | T2 | 0.60 (0.28–1.21) | 0.158 |  | 0.60 (0.29–1.22) | 0.168 |  | 0.59 (0.28–1.22) | 0.163 |
|  | T3 | 0.57 (0.27–1.14) | 0.118 |  | 0.57 (0.27–1.15) | 0.125 |  | 0.65 (0.29–1.39) | 0.267 |
| sICH within 48h | continuous | 1.21 (0.85–1.71) | 0.281 |  | 1.19 (0.83–1.68) | 0.336 |  | 1.14 (0.77–1.67) | 0.491 |
|  | T1 | – |  |  | – |  |  | – |  |
|  | T2 | 0.94 (0.26–3.79) | 0.925 |  | 0.87 (0.23–3.61) | 0.843 |  | 0.77 (0.18–3.43) | 0.713 |
|  | T3 | 1.51 (0.48–5.67) | 0.501 |  | 1.39 (0.42–5.42) | 0.607 |  | 1.13 (0.29–4.93) | 0.867 |
| 3-month mortality | continuous | 1.64 (1.30–2.07) | <0.001 |  | 1.72 (1.35–2.19) | <0.001 |  | 1.77 (1.36–2.32) | <0.001 |
|  | T1 | – |  |  | – |  |  | – |  |
|  | T2 | 1.07 (0.65–1.76) | 0.799 |  | 1.12 (0.68–1.87) | 0.651 |  | 1.15 (0.68–1.94) | 0.607 |
|  | T3 | 2.07 (1.32–3.29) | 0.002 |  | 2.35 (1.47–3.79) | <0.001 |  | 2.43 (1.47–4.06) | <0.001 |

OR, odds ratio; CI, confidence interval; TyG, triglyceride-glucose index; LAA, large artery atherosclerosis; CE, cardioembolism; mRS, modified Rankin Scale score; sICH, symptomatic intracranial hemorrhage;
Model 1, unadjusted;
Model 2, adjusted for age;
Model 3, adjusted for age, sex, atrial fibrillation, hypertension, hyperlipidemia, smoking status, Onset to puncture time, and occlusion location.

T1, TyG ≤ 6.92; T2, 6.92 < TyG ≤ 7.60; T3, TyG > 7.60.

**Table S5.** Correlations between TyG index and post-EVT outcomes in all patients with successful recanalization (sensitivity analysis)

| **Outcomes** | **TyG** | Model 1 | |  | Model 2 | |  | Model 3 | |
| --- | --- | --- | --- | --- | --- | --- | --- | --- | --- |
|  |  | OR (95% CI) | *P*‐value |  | OR (95% CI) | *P*‐value |  | OR (95% CI) | *P*‐value |
| mRS shift | continuous | 1.62 (1.35-1.94) | <0.001 |  | 1.75 (1.45-2.10) | <0.001 |  | 1.77 (1.45-2.15) | <0.001 |
|  | T1 | – |  |  | – |  |  | – |  |
|  | T2 | 1.10 (0.79–1.53) | 0.568 |  | 1.20 (0.86–1.68) | 0.276 |  | 1.19 (0.85–1.68) | 0.306 |
|  | T3 | 1.83 (1.31–2.55) | <0.001 |  | 2.23 (1.59–3.14) | <0.001 |  | 2.20 (1.53–3.16) | <0.001 |
| mRS ≥3 | continuous | 1.61 (1.30-1.99) | <0.001 |  | 1.73 (1.39-2.18) | <0.001 |  | 1.71 (1.34-2.21) | <0.001 |
|  | T1 | – |  |  | – |  |  | – |  |
|  | T2 | 1.10 (0.64–1.90) | 0.736 |  | 1.16 (0.67–2.02) | 0.603 |  | 1.17 (0.66–2.08) | 0.587 |
|  | T3 | 2.22 (1.36–3.68) | 0.002 |  | 2.51 (1.51-4.23) | <0.001 |  | 2.55 (1.48–4.46) | <0.001 |
| sICH within 48h | continuous | 1.21 (0.81-1.76) | 0.343 |  | 1.18 (0.79-1.72) | 0.401 |  | 1.13 (0.74-1.71) | 0.558 |
|  | T1 | – |  |  | – |  |  | – |  |
|  | T2 | 1.29 (0.59–2.87) | 0.527 |  | 1.28 (0.58–2.86) | 0.543 |  | 1.34 (0.60–3.08) | 0.479 |
|  | T3 | 1.28 (0.58–2.84) | 0.543 |  | 1.27 (0.59–2.86) | 0.551 |  | 1.20 (0.51–2.84) | 0.679 |
| 3-month mortality | continuous | 1.75 (1.37-2.26) | <0.001 |  | 1.81 (1.40-2.35) | <0.001 |  | 1.86 (1.40-2.48) | <0.001 |
|  | T1 | – |  |  | – |  |  | – |  |
|  | T2 | 1.10 (0.64–1.90) | 0.736 |  | 1.16 (0.67–2.02) | 0.603 |  | 1.17 (0.66–2.08) | 0.597 |
|  | T3 | 2.22 (1.36–3.68) | 0.002 |  | 2.51 (1.51–4.23) | <0.001 |  | 2.55 (1.48–4.46) | <0.001 |

OR, odds ratio; CI, confidence interval; TyG, triglyceride-glucose index; LAA, large artery atherosclerosis; CE, cardioembolism; mRS, modified Rankin Scale score; sICH, symptomatic intracranial hemorrhage;
Model 1, unadjusted;
Model 2, adjusted for age;
Model 3, adjusted for age, sex, atrial fibrillation, hypertension, hyperlipidemia, smoking status, Onset to puncture time, and occlusion location.

**Table S6.** Correlations between TyG index and post-EVT outcomes in LAA and CE stroke patients with successful recanalization (sensitivity analysis)

| **Outcomes** | **TyG** | Model 1 | |  | Model 2 | |  | Model 3 | |
| --- | --- | --- | --- | --- | --- | --- | --- | --- | --- |
|  |  | OR (95% CI) | *P*‐value |  | OR (95% CI) | *P*‐value |  | OR (95% CI) | *P*‐value |
| LAA stroke patients (n = 272) |  |  |  |  |  |  |  |  |  |
| mRS shift | continuous | 1.53 (1.15-2.04) | 0.004 |  | 1.61 (1.20-2.16) | 0.001 |  | 1.70 (1.24-2.32) | 0.001 |
|  | T1 | – |  |  | – |  |  | – |  |
|  | T2 | 1.18 (0.68–2.05) | 0.558 |  | 1.23 (0.70–2.15) | 0.47 |  | 1.25 (0.70–2.23) | 0.454 |
|  | T3 | 1.72 (1.00–2.95) | 0.051 |  | 2.01 (1.15–3.52) | 0.014 |  | 2.20 (1.22–3.99) | 0.009 |
| mRS ≥3 | continuous | 1.51 (1.09-2.12) | 0.015 |  | 1.53 (1.09-2.19) | 0.017 |  | 1.59 (1.09-2.35) | 0.019 |
|  | T1 | – |  |  | – |  |  | – |  |
|  | T2 | 0.85 (0.32–2.32) | 0.742 |  | 0.89 (0.33–2.50) | 0.824 |  | 1.23 (0.71–2.12) | 0.463 |
|  | T3 | 1.74 (0.75–4.41) | 0.216 |  | 1.92 (0.79–5.09) | 0.167 |  | 2.31 (0.83–6.70) | 0.119 |
| sICH within 48h | continuous | 1.13 (0.55-2.21) | 0.724 |  | 1.03 (0.49-2.06) | 0.937 |  | 0.82 (0.37-1.72) | 0.6 |
|  | T1 | – |  |  | – |  |  | – |  |
|  | T2 | 1.05 (0.25–5.28) | 0.945 |  | 0.94 (0.22–4.83) | 0.934 |  | 0.90 (0.19–5.05) | 0.902 |
|  | T3 | 1.37 (0.37–6.55) | 0.655 |  | 1.20 (0.30–5.98) | 0.803 |  | 0.95 (0.20–5.39) | 0.952 |
| 3-month mortality | continuous | 1.56 (1.01-2.41) | 0.044 |  | 1.59 (1.02-2.41) | 0.04 |  | 1.66 (1.00-2.79) | 0.05 |
|  | T1 | – |  |  | – |  |  | – |  |
|  | T2 | 0.85 (0.32–1.32) | 0.742 |  | 0.89 (0.33–2.50) | 0.824 |  | 1.04 (0.35–3.20) | 0.945 |
|  | T3 | 1.74 (0.75–4.41) | 0.216 |  | 1.91 (0.79–5.09) | 0.167 |  | 2.31 (0.83–6.99) | 0.119 |
| CE stroke patients (n = 372) |  |  |  |  |  |  |  |  |  |
| mRS shift | continuous | 1.83 (1.43-2.33) | <0.001 |  | 1.87 (1.46-2.39) | <0.001 |  | 1.80 (1.39-2.34) | <0.001 |
|  | T1 | – |  |  | – |  |  | – |  |
|  | T2 | 1.12 (0.73–1.70) | 0.608 |  | 1.16 (0.76–1.77) | 0.496 |  | 1.13 (0.73–1.76) | 0.571 |
|  | T3 | 2.16 (1.38–3.38) | <0.001 |  | 2.38 (1.52–3.72) | <0.001 |  | 2.15 (1.34–3.46) | 0.002 |
| mRS ≥3 | continuous | 1.74 (1.72-2.34) | <0.001 |  | 1.84 (1.36-2.54) | <0.001 |  | 1.74 (1.25-2.46) | 0.001 |
|  | T1 | – |  |  | – |  |  | – |  |
|  | T2 | 1.35 (0.69–2.64) | 0.376 |  | 1.35 (0.68–2.66) | 0.383 |  | 1.37 (0.68–2.79) | 0.378 |
|  | T3 | 2.84 (1.54–5.33) | <0.001 |  | 3.01 (1.61–5.72) | <0.001 |  | 3.00 (1.54–5.93) | 0.001 |
| sICH within 48h | continuous | 1.31 (0.80-2.07) | 0.261 |  | 1.29 (0.79-2.04) | 0.293 |  | 1.31 (0.78-2.15) | 0.289 |
|  | T1 | – |  |  | – |  |  | – |  |
|  | T2 | 1.55 (0.61–4.04) | 0.356 |  | 1.53 (0.59–3.98) | 0.377 |  | 1.57 (0.59–4.25) | 0.63 |
|  | T3 | 1.31 (0.48–3.53) | 0.596 |  | 1.29 (0.47–3.51) | 0.612 |  | 1.31 (0.45–3.73) | 0.612 |
| 3-month mortality | continuous | 2.02 (1.47-2.80) | <0.001 |  | 2.05 (1.48-2.88) | <0.001 |  | 2.08 (1.47-2.99) | <0.001 |
|  | T1 | – |  |  | – |  |  | – |  |
|  | T2 | 1.35 (0.69–2.64) | 0.376 |  | 1.35 (0.68–2.66) | 0.383 |  | 1.37 (0.68–2.79) | 0.379 |
|  | T3 | 2.84 (1.54–5.33) | <0.001 |  | 3.01 (1.61–5.72) | <0.001 |  | 2.99 (1.54–5.93) | 0.001 |

OR, odds ratio; CI, confidence interval; TyG, triglyceride-glucose index; LAA, large artery atherosclerosis; CE, cardioembolism; mRS, modified Rankin Scale score; sICH, symptomatic intracranial hemorrhage;
Model 1, unadjusted;
Model 2, adjusted for age;
Model 3, adjusted for age, sex, atrial fibrillation, hypertension, hyperlipidemia, smoking status, Onset to puncture time, and occlusion location.
